# Supplementary material for: Evaluating the Incidence of Opioid-Induced Respiratory Depression Associated with Oliceridine and Morphine as Measured by the Frequency and Average Cumulative Duration of Dosing Interruption in Patients Treated for Acute Postoperative Pain
Source: PubMed Central journal article supplement — Clin Drug Investig. 2020 Jun 24;40(8):755–64. doi: 10.1007/s40261-020-00936-0 (PMC7359152; doi:10.1007/s40261-020-00936-0), 2020-06-24
Supplement: 40261_2020_936_MOESM1_ESM.pdf [file 40261_2020_936_MOESM1_ESM.pdf]

**Title:**

**Reduced Incidence of Opioid-Induced Respiratory Depression with Oliceridine Compared to Morphine As Measured By The Frequency And Average Cumulative Duration of Dosing Interruption In Patients Treated For Acute Postoperative Pain**

**Authors:** Sabry Ayad, MD<sup>1,4</sup>; Mark A Demitrack, MD<sup>2</sup>; David A Burt PhD<sup>2</sup>; Cathy Michalsky, MS<sup>2</sup>; Linda Wase, MD<sup>2</sup>; Michael J Fossler, PharmD, PhD<sup>2</sup>; Ashish K.Khanna, MD,FCCP,FCCM<sup>3,4</sup>

**Affiliation:**

1. Cleveland Clinic, Outcomes Research, Anesthesiology Institute, Fairview Hospital, Cleveland OH, USA
2. Trevena Inc., Chesterbrook, PA, USA
3. Wake Forest School of Medicine, Winston-Salem, NC, USA
4. Outcomes Research Consortium, Cleveland, OH

**Corresponding Author:**

Dr Sabry Ayad,

Anesthesiology Institute, Outcomes Research, Fairview Hospital, Cleveland Clinic,  
18101 Lorain Avenue, Cleveland, OH 44111, USA; Tel: +1 216 476 7052; E-mail:  
Saayad@ccf.org

**Journal:** Clinical Drug Investigation

**Multicenter, randomized, double-blind, placebo-and active-controlled phase 3 studies**

- Age  $\geq 18$  and  $\leq 75$  years at screening
- $\geq 40$  kg in body weight or a body mass index (BMI) of  $\leq 35$  kg/m<sup>2</sup>
- Scheduled to undergo primary surgery with no additional collateral procedures

|                                            | Hard Tissue<br>(Bunionectomy)                                                   | Soft Tissue<br>(Abdominoplasty)                     |
|--------------------------------------------|---------------------------------------------------------------------------------|-----------------------------------------------------|
| Sample size, N<br>(randomized and treated) | 389                                                                             | 401                                                 |
| Treatment period                           | 48 hours                                                                        | 24 hours                                            |
| Anesthesia                                 | Regional<br>(popliteal sciatic nerve<br>block)                                  | General                                             |
| Pain entry criteria                        | NRS* $\geq 4$ within 9 hours<br>after discontinuation of<br>regional anesthesia | NRS* $\geq 5$ within 4 hours<br>from end of surgery |

**Key exclusion criteria:** sleep apnea, evidence of hemodynamic instability or respiratory insufficiency, or surgical/anesthetic complications  
 \*NRS= numeric rating scale for pain score

| Treatment          | Clinician-administered<br>Loading Dose | Patient-administered<br>Demand Dose | Clinician-administered<br>Supplemental Dose |
|--------------------|----------------------------------------|-------------------------------------|---------------------------------------------|
| <b>Oliceridine</b> | 1.5 mg                                 | 0.1 mg                              | 0.75 mg q1h PRN                             |
|                    |                                        | 0.35 mg                             |                                             |
|                    |                                        | 0.5 mg                              |                                             |
| <b>Morphine</b>    | 4 mg                                   | 1 mg                                | 2 mg q1h PRN                                |
| <b>Placebo</b>     | Volume-matched<br>solution             | Volume-matched<br>solution          | Volume-matched<br>solution                  |

*Multimodal therapy was not permitted; Rescue pain medication (etodolac 200 mg PO q6h PRN) was permitted during the treatment period if study medication was inadequate*

*Certified nurse anesthetists blinded to treatment monitored each patient and may have withheld study medication according to patient's respiratory status*
